# Supplementary material
Source: PubMed Central journal article supplement (PMC3226883)
Supplement: NIHMS325610-supplement-01.pdf [file NIHMS325610-supplement-01.pdf]

Supplementary:

**Table 4: Associations of MPO With Atherosclerosis Phenotypes After Adjustment for Traditional Risk Factors and inflammatory biomarkers**

|                                                                      | Prevalent CAC<br>(n=2502) | Prevalent Plaque<br>(n=2287) | APB<br>(n=2287) |         | AWT<br>(n=2300) |         |
|----------------------------------------------------------------------|---------------------------|------------------------------|-----------------|---------|-----------------|---------|
|                                                                      | OR (95% CI)               | OR (95% CI)                  | Beta coeff      | P value | Beta coeff      | P value |
| <b>Model Adjusted for Traditional Risk Factors + TNFR1A</b>          |                           |                              |                 |         |                 |         |
| Log_MPO                                                              | 0.95 (0.82, 1.1)          | 1.08 (0.95, 1.21)            | 0.06            | 0.20    | 0.02            | 0.03    |
| Q1                                                                   | Reference                 | Reference                    | Reference       |         | Reference       |         |
| Q2                                                                   | 0.82 (0.59, 1.14)         | 1.01 (0.77, 1.32)            | -0.09           | 0.39    | -0.02           | 0.27    |
| Q3                                                                   | 0.78 (0.55, 1.12)         | 0.97 (0.72, 1.29)            | -0.08           | 0.44    | 0.004           | 0.82    |
| Q4                                                                   | 0.75 (0.5, 1.11)          | 1.35 (0.98, 1.86)            | 0.20            | 0.10    | 0.04            | 0.06    |
| <b>Model Adjusted for Traditional Risk Factors + MCP1</b>            |                           |                              |                 |         |                 |         |
| Log_MPO                                                              | 0.98 (0.87, 1.1)          | 1.09 (0.99, 1.20)            | 0.06            | 0.08    | 0.01            | 0.03    |
| Q1                                                                   | Reference                 | Reference                    | Reference       |         | Reference       |         |
| Q2                                                                   | 0.86 (0.63, 1.2)          | 1.03 (0.79, 1.34)            | -0.08           | 0.44    | -0.02           | 0.23    |
| Q3                                                                   | 0.82 (0.59, 1.14)         | 0.96 (0.74, 1.26)            | -0.09           | 0.38    | -0.001          | 0.97    |
| Q4                                                                   | 0.84 (0.6, 1.17)          | 1.39 (1.06, 1.83)            | 0.21            | 0.04    | 0.03            | 0.06    |
| <b>Model Adjusted for Traditional Risk Factors + Osteoprotegerin</b> |                           |                              |                 |         |                 |         |
| Log_MPO                                                              | 0.98 (0.87, 1.1)          | 1.1 (1.003, 1.21)            | 0.07            | 0.04    | 0.01            | 0.02    |
| Q1                                                                   | Reference                 | Reference                    | Reference       |         | Reference       |         |
| Q2                                                                   | 0.84 (0.61, 1.16)         | 1.02 (0.78, 1.33)            | -0.08           | 0.41    | -0.02           | 0.24    |
| Q3                                                                   | 0.83 (0.6, 1.15)          | 0.98 (0.75, 1.28)            | -0.08           | 0.45    | 0.001           | 0.96    |
| Q4                                                                   | 0.83 (0.6, 1.15)          | 1.4 (1.07, 1.83)             | 0.22            | 0.03    | 0.03            | 0.05    |
| <b>Model Adjusted for Traditional Risk Factors + MMP9</b>            |                           |                              |                 |         |                 |         |
| Log_MPO                                                              | 0.98 (0.87, 1.1)          | 1.10 (1.001, 1.21)           | 0.07            | 0.05    | 0.01            | 0.02    |
| Q1                                                                   | Reference                 | Reference                    | Reference       |         | Reference       |         |
| Q2                                                                   | 0.86 (0.63, 1.19)         | 1.03 (0.79, 1.35)            | -0.07           | 0.48    | -0.02           | 0.24    |
| Q3                                                                   | 0.84 (0.61, 1.17)         | 0.998 (0.77, 1.30)           | -0.06           | 0.54    | 0.002           | 0.88    |

|                                                            |                   |                    |           |      |           |      |
|------------------------------------------------------------|-------------------|--------------------|-----------|------|-----------|------|
| Q4                                                         | 0.84 (0.61, 1.16) | 1.04 (0.93, 1.16)  | 0.23      | 0.02 | 0.03      | 0.04 |
| <b>Model Adjusted for Traditional Risk Factors + hsCRP</b> |                   |                    |           |      |           |      |
| Log_MPO                                                    | 0.97 (0.86, 1.09) | 1.09 (0.99, 1.2)   | 0.06      | 0.08 | 0.02      | 0.01 |
| Q1                                                         | Reference         | Reference          | Reference |      | Reference |      |
| Q2                                                         | 0.84 (0.61, 1.16) | 1.01 (0.78, 1.32)  | -0.09     | 0.39 | -0.02     | 0.23 |
| Q3                                                         | 0.83 (0.6, 1.15)  | 0.99 (0.76, 1.29)  | -0.07     | 0.48 | 0.004     | 0.83 |
| Q4                                                         | 0.81 (0.58, 1.13) | 1.37 (1.04, 1.79)  | 0.20      | 0.04 | 0.04      | 0.03 |
| <b>Model Adjusted for Traditional Risk Factors + SRAGE</b> |                   |                    |           |      |           |      |
| Log_MPO                                                    | 0.97 (0.87, 1.09) | 1.10 (1.003, 1.21) | 0.07      | 0.04 | 0.02      | 0.01 |
| Q1                                                         | Reference         | Reference          | Reference |      | Reference |      |
| Q2                                                         | 0.85 (0.61, 1.17) | 1.03 (0.79, 1.34)  | -0.08     | 0.45 | -0.02     | 0.25 |
| Q3                                                         | 0.85 (0.61, 1.17) | 0.994 (0.76, 1.30) | -0.06     | 0.54 | 0.003     | 0.84 |
| Q4                                                         | 0.83 (0.6, 1.15)  | 1.41 (1.08, 1.84)  | 0.23      | 0.02 | 0.04      | 0.03 |
| <b>Model Adjusted for Traditional Risk Factors + IL18</b>  |                   |                    |           |      |           |      |
| Log_MPO                                                    | 0.99 (0.85, 1.12) | 1.13 (1.00, 1.28)  | 0.07      | 0.14 | 0.02      | 0.05 |
| Q1                                                         | Reference         | Reference          | Reference |      | Reference |      |
| Q2                                                         | 0.97 (0.65, 1.46) | 1.14 (0.82, 1.6)   | -0.03     | 0.80 | -0.03     | 0.21 |
| Q3                                                         | 0.96 (0.64, 1.46) | 1.11 (0.79, 1.55)  | -0.04     | 0.76 | 0.002     | 0.93 |
| Q4                                                         | 0.93 (0.61, 1.43) | 1.6 (1.13, 2.26)   | 0.26      | 0.05 | 0.05      | 0.03 |

CAC, coronary artery calcification; APB, aorta plaque burden; AWT, aorta wall thickness; TNFR1A, tumor necrosis factor-alpha 1 receptor; MCP-1, monocyte chemoattractant protein-1; MMP9, matrix metalloproteinase-9; hsCRP, high sensitivity C-reactive protein; SRAGE, soluble receptor for advanced glycation end products; IL18, interleukin-18.
